# Supplementary material for: Whole-genome single-nucleotide polymorphism (SNP) marker discovery and association analysis with the eicosapentaenoic acid (EPA) and docosahexaenoic acid (DHA) content in Larimichthys crocea
Source: PubMed Central journal article supplement (PMC5180582; doi:10.7717/peerj.2664), 2016-12-21

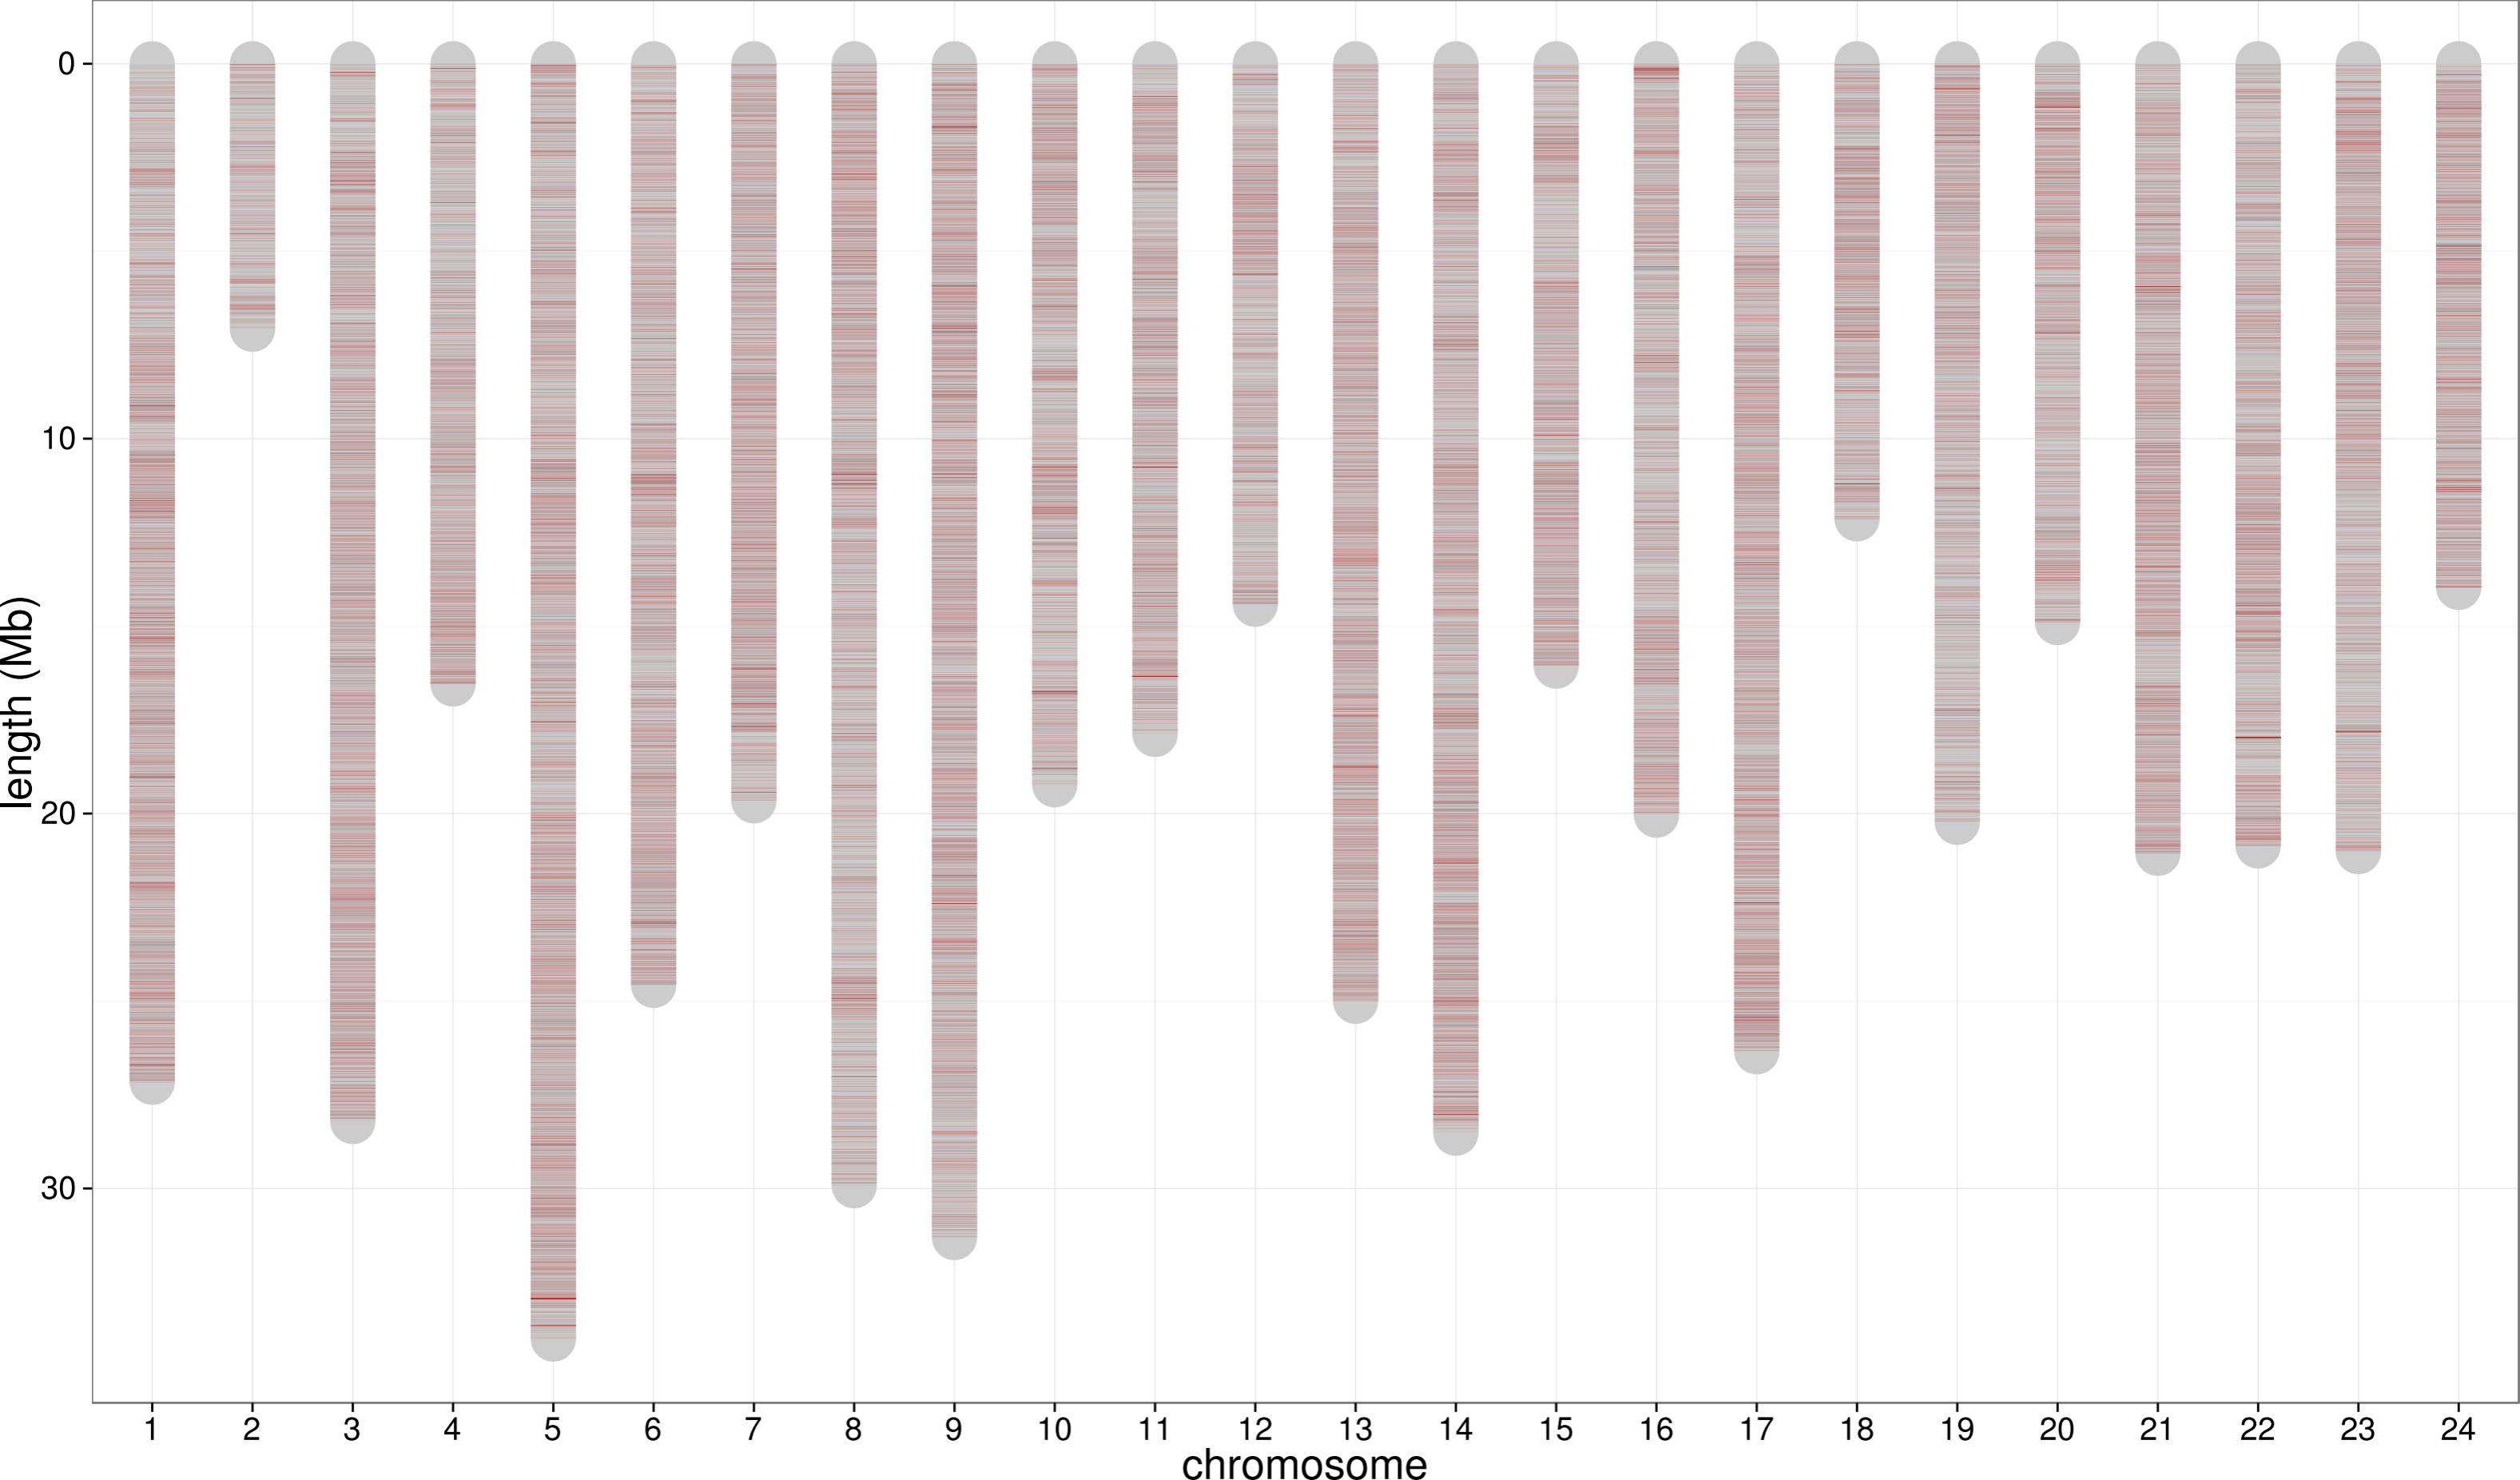

Supplement: peerj-04-2664-s005.pdf [file peerj-04-2664-s005.pdf]
