# Supplementary material for: Whole-genome single-nucleotide polymorphism (SNP) marker discovery and association analysis with the eicosapentaenoic acid (EPA) and docosahexaenoic acid (DHA) content in Larimichthys crocea
Source: PeerJ journal article supplement (doi:10.7717/peerj.2664), 2016-12-21

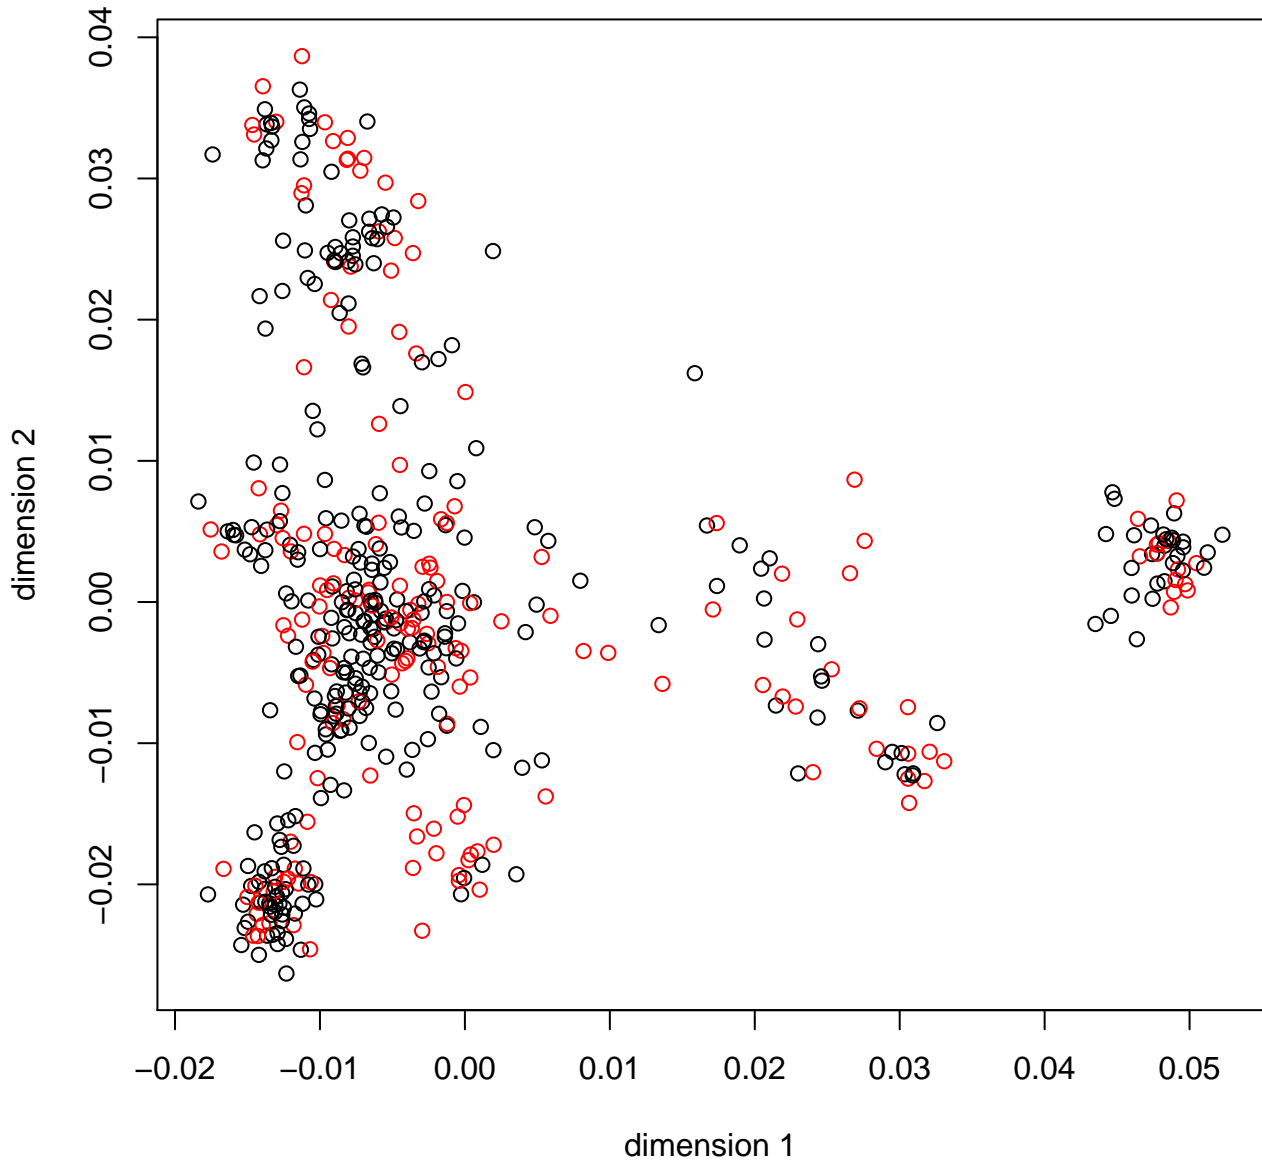

Supplement: SI_Figure_4.pdf [file SI_Figure_4.pdf]
