# Supplementary material for: Whole-genome single-nucleotide polymorphism (SNP) marker discovery and association analysis with the eicosapentaenoic acid (EPA) and docosahexaenoic acid (DHA) content in Larimichthys crocea
Source: PeerJ. 2016 Dec 21;4:e2664. doi: 10.7717/peerj.2664 (PMC5180582; doi:10.7717/peerj.2664)
Supplement: Table S2 [file peerj-04-2664-s002.xlsx]

## Sheet: SNP validation
	598	600	602	605	607	608	609	610	611	615	616	619	622	626	627	628	630	631	633	634	636	639	641	643	654	656	660	666	667	672
LG24_12617902	CC/CC	CT/CT	CT/CT	CC/CC	CC/CC	CC/CC	CC/CC	CC/CC	CC/CC	CC/CC	CC/CC	CC/CC	CC/CC	CC/CC	CC/CC	CC/CC	CC/CC	CT/CT	CT/CC	CC/CC	CT/CT	CT/CT	CT/CT	CC/CC	CC/CC	CC/CC	CC/CC	CC/CC	CC/CC	CC/CC
LG17_25383450	AA/AA	AA/AA	AA/AA	AT/AT	AA/AA	AA/AA	AA/AA	AA/AA	AA/AA	AA/AA	AA/AA	AA/AA	AT/AT	AA/AA	AA/AA	AA/AA	AA/AA	AA/AA	AA/AA	AA/AA	AA/AA	AA/AA	AA/AA	AA/AA	AT/AT	AA/AA	AA/AA	AA/AA	AA/AA	AT/AT
LG24_1071353	AA/AA	AA/AA	AA/AA	AA/AA	AA/AA	AA/AA	AA/AA	AA/TT	AA/AA	AA/AA	AA/AA	AA/AA	AA/AA	NN/TT	AA/AA	AT/TT	AA/AA	AA/AA	AA/AA	AG/AG	AA/AA	AA/TT	AA/AA	AA/AA	AA/AA	AA/AA	AA/AA	AA/AA	AA/AA	AA/AA
000000354_264911	CC/CC	CC/CC	CC/CC	CC/CC	CC/CC	CC/CC	CC/CC	CC/CC	CC/CC	CC/CC	CC/CC	CC/CC	CC/CC	CC/CC	CC/CC	CC/CC	CC/CC	CC/CC	CC/CC	CC/CC	AC/AC	CC/CC	CC/CC	AA/AC	CC/CC	CC/CC	CC/CC	AC/AC	AC/AC	CC/CC
000000752_166551	TT/TT	TT/TT	TT/TT	TT/TT	TT/TT	TT/TT	TT/TT	TT/TT	TT/TT	TT/TT	TT/TT	TT/TT	TT/TT	TT/TT	TT/TT	TT/TT	TT/TT	TT/TT	CT/CT	TT/TT	TT/TT	TT/TT	TT/TT	TT/TT	TT/TT	TT/TT	TT/TT	TT/TT	TT/TT	TT/TT
LG10_10759497	GG/GG	GG/GG	AG/AG	GG/GG	GG/GG	GG/GG	GG/GG	GG/GG	GG/GG	GG/GG	GG/GG	GG/GG	GG/GG	GG/GG	GG/GG	AG/GG	AG/AG	AG/AG	GG/GG	GG/GG	GG/GG	AG/AG	GG/GG	GG/GG	GG/GG	GG/GG	GG/GG	GG/GG	GG/GG	GG/GG
LG11_12378936	AG/AG	AA/AA	AG/AG	AA/AA	AA/AA	GG/GG	GG/GG	AA/AA	AG/AG	AG/AG	AA/AA	AG/AG	AG/AG	AG/AG	AG/AG	GG/GG	AG/AG	AG/AG	GG/GG	AG/AG	AG/AG	AG/AG	GG/GG	AA/AA	AG/AG	AG/AG	AG/AG	AA/AA	AG/AG	AG/AA
000003271_196081	CC/CC	CC/CC	CC/CC	CC/CC	TT/TT	CC/CC	CC/CC	CT/CC	CT/CC	CC/CC	CT/CT	CC/CC	CC/CC	CC/CC	CC/CC	CC/CC	CC/CC	CC/CC	CC/CC	CT/CT	TT/TT	CT/CT	CC/CC	CT/CT	CT/CT	CC/CC	CC/CC	CT/CT	CC/CC	CT/CT
LG6_22363071	GG/GG	GG/GG	GG/GG	GG/GG	GG/GG	GG/GG	CG/CG	GG/GG	GG/GG	GG/GG	GG/GG	CG/CG	CG/CG	GG/GG	CG/CG	GG/GG	CG/CG	CG/CG	CG/CG	GG/GG	GG/GG	GG/GG	GG/GG	GG/GG	CG/CG	GG/GG	CG/CG	GG/GG	GG/GG	CG/GG
000002803_417873	CC/CC	CG/CG	CG/CG	CC/CC	CC/CC	CC/CC	CG/CG	CC/CC	CC/CC	CG/CG	CC/CC	CC/CC	CC/CC	CG/CG	CG/CG	CG/CG	CC/CC	CC/CC	CG/CG	CG/CG	CC/CC	CG/CG	CG/CG	CC/CC	CG/CG	CC/CC	CC/CC	CC/CC	CC/CC	CG/CG
LG21_20826626	CC/CC	CC/CC	AC/AC	AC/AC	CC/CC	CC/CC	CC/CC	CC/CC	AC/AC	AC/AC	CC/CC	AA/AA	CC/CC	AC/AC	CC/CC	AC/AC	CC/CC	CC/CC	AC/AC	AC/AC	AC/AC	CC/CC	CC/CC	CC/CC	AC/AC	AC/AC	CC/CC	AA/AA	AC/AC	CC/CC
000003159_212911	CC/CC	AC/AC	AC/AC	AC/AC	CC/CC	AC/AC	CC/CC	CC/CC	CC/CC	CC/CC	AC/AC	CC/CC	CC/CC	CC/CC	CC/CC	CC/CC	AC/AC	CC/CC	CC/CC	CC/CC	CC/CC	CC/CC	CC/CC	AC/AC	CC/CC	CC/CC	CC/CC	CC/CC	CC/CC	CC/CC
LG14_19183580	AC/AC	AC/AC	AC/AC	AA/AA	AA/AA	AA/AA	AA/AA	AC/AA	AC/AC	AA/AA	AA/AA	AC/AC	AC/AC	AA/AA	AA/AA	AA/AA	AC/AC	AC/AC	AA/AA	AA/AA	AA/AA	AA/AA	AA/AA	AC/AC	AC/AC	AC/AC	AA/AA	AA/AA	AA/AA	AC/AC
LG20_7203347	AG/AG	AG/AG	AG/AG	AG/AG	AG/AG	AG/AG	GG/GG	AG/AG	AG/AG	AA/AA	AG/AG	AG/AG	AG/AG	AG/AG	AG/AG	AG/AG	AG/AG	AG/AG	AG/AG	AG/AG	AA/AA	AA/AA	AG/AG	AG/AG	AG/AG	AG/AG	AG/GG	AG/AG	AG/AG	AG/AG
000000205_265694	CG/CG	CG/CG	CC/CC	GG/GG	CC/CC	GG/GG	CG/CG	CG/CG	CG/CG	CC/CC	CG/CC	CC/CC	CC/CC	GG/GG	CC/CC	CG/CG	CC/CC	CC/CC	GG/GG	CG/CG	CC/CC	CC/CC	CC/CC	CG/CG	CC/CC	CG/CG	CG/CG	CC/CC	CC/CC	CG/CG
000000573_1940	CT/CT	CT/CT	CT/CT	TT/TT	TT/TT	TT/TT	TT/TT	TT/TT	CT/CT	TT/TT	CT/CT	CT/CT	TT/TT	CT/CT	TT/TT	TT/TT	TT/TT	TT/TT	CT/CT	TT/TT	CT/CT	CT/CT	TT/TT	TT/TT	CT/TT	CT/TT	TT/TT	TT/TT	TT/TT	CT/CT
LG17_5712694	AG/AG	AG/AG	AG/AG	GG/GG	AG/AG	GG/GG	GG/GG	AG/AG	GG/GG	GG/GG	AG/AG	GG/GG	AA/AA	GG/GG	AG/AG	AG/AG	GG/GG	GG/GG	GG/GG	AA/AA	GG/GG	GG/GG	GG/GG	GG/GG	AG/AG	GG/GG	GG/GG	AG/AG	GG/GG	AG/GG
LG20_13778730	GG/GG	GG/GG	GG/GG	GG/GG	AG/AG	GG/GG	AG/AG	GG/GG	GG/GG	GG/GG	GG/GG	GG/GG	GG/GG	AG/GG	GG/GG	GG/GG	AG/AG	GG/GG	GG/GG	GG/GG	AG/AG	GG/GG	AG/GG	AG/AG	GG/GG	GG/GG	GG/GG	AG/AG	GG/GG	AG/AG
LG11_16341823	CC/CC	CC/CC	CG/CG	CG/CG	CG/CG	CC/CC	CC/CC	CG/CC	CG/CG	CC/CC	CG/CG	CG/CG	CC/CC	CG/CC	CC/CC	NN/CC	CC/CC	CG/CG	CC/CC	CC/CC	CG/CC	CG/CG	CG/CG	CC/CC	CC/CC	CC/CC	CC/CC	CC/CC	CG/CG	CG/CG
LG14_3454171	AA/AA	AA/AA	AG/AG	AA/AA	AA/AA	AA/AA	AA/AA	AA/AA	AA/AA	AA/AA	AA/AA	AA/AA	AA/AA	AA/AA	AA/AA	AA/AA	AA/AA	AA/AA	AA/AA	AA/AA	AA/AA	AA/AA	AA/AA	AG/AG	AA/AA	AG/AG	AA/AA	AA/AA	AG/AG	AA/AA
000000192_352661	GG/GG	GT/GT	GT/GT	GT/GT	GG/GG	GG/GG	GT/GG	GG/GG	GG/GG	NN/GG	GT/GT	GG/GG	GG/GG	GG/GG	GG/GG	GT/GT	GT/GT	GT/GT	GT/GG	GG/GG	GT/GG	GG/GG	GG/GG	GT/GT	GT/GT	GG/GG	GG/GG	GG/GG	GG/GG	GG/GG
LG17_17905321	CC/CC	CC/CC	CC/CC	TT/TT	CC/CC	CC/CC	CC/CC	CC/CC	CC/CC	CT/CT	TT/TT	CT/CT	CC/CC	CC/CC	CC/CC	CC/CC	CT/CT	CC/CC	CC/CC	CT/CT	CC/CC	CC/CC	CC/CC	CT/CT	CC/CC	CC/CC	CC/CC	CC/CC	CT/CT	TT/TT
LG16_173846	TT/TT	CT/CT	TT/TT	TT/TT	TT/TT	CT/CT	TT/TT	TT/TT	CT/CT	NN/TT	TT/TT	CT/CT	CT/CT	CT/CT	CT/CT	TT/TT	TT/TT	CT/CT	CT/TT	CT/CT	CT/CT	CC/CC	CT/TT	TT/TT	CT/TT	CC/CC	TT/TT	CT/TT	CT/TT	TT/TT
000003153_25337	CC/CC	TT/TT	CC/CC	CC/CC	CC/CC	CC/CC	NN/CC	CC/CC	CC/CC	NN/CC	TT/TT	CC/CC	CC/CC	CT/CT	CC/CC	CC/CC	CC/CC	CC/CC	CC/CC	CC/CC	CC/CC	CC/CC	CC/CC	CC/CC	CT/TT	CC/CC	CC/CC	CC/CC	CT/CT	CC/CC
000003159_228310	TT/TT	TT/TT	TT/TT	AT/AT	TT/TT	TT/TT	TT/TT	AT/AT	AT/AT	TT/TT	AT/AT	AT/AT	TT/TT	TT/TT	TT/TT	AT/TT	TT/TT	TT/TT	AT/AT	TT/TT	TT/TT	TT/TT	TT/TT	TT/TT	TT/TT	AT/TT	AT/AT	TT/TT	TT/TT	TT/TT
LG10_16753324	GG/GG	AG/AG	AG/AG	GG/GG	AG/AG	GG/GG	GG/GG	GG/GG	GG/GG	GG/GG	GG/GG	GG/GG	AG/AG	AG/AG	GG/GG	GG/GG	GG/GG	GG/GG	GG/GG	GG/GG	AG/AG	GG/GG	GG/GG	AG/AG	GG/GG	AG/AG	AG/AG	GG/GG	NN/GG	AG/AG
000000111_45424	CT/CT	CT/CT	CT/CT	CT/CC	CT/CT	CT/CT	CT/CT	CT/CT	CC/CC	CT/CT	CT/CT	CC/CC	CT/CT	CT/CT	CT/CC	CT/CC	CT/CT	CT/CT	CT/CT	CT/CC	CT/CT	CT/CT	CT/CT	CC/CC	CC/CC	CT/CC	CT/CT	CT/CT	CT/CT	CC/CC
000003221_851718	CC/CC	CC/CC	CC/CC	CC/CC	CC/CC	CC/CC	CC/CC	CC/CC	CC/CC	CC/CC	CT/CT	CC/CC	CC/CC	CC/CC	CC/CC	CC/CC	CC/CC	CC/CC	CC/CC	CC/CC	CT/CC	CC/CC	CC/CC	CT/CT	CC/CC	CC/CC	CC/CC	CC/CC	CC/CC	CC/CC
LG14_23519114	AG/GG	GG/GG	GG/GG	GG/GG	GG/GG	GG/GG	AG/GG	AG/AG	AG/AG	NN/GG	GG/GG	GG/GG	AG/GG	GG/GG	GG/GG	AG/GG	AG/GG	GG/GG	AG/AG	GG/GG	GG/GG	GG/GG	AG/AG	GG/GG	AG/AG	GG/GG	GG/GG	GG/GG	GG/GG	GG/GG
000000001_124945	TT/TT	TT/TT	TT/TT	TT/TT	TT/TT	CT/CT	TT/TT	TT/TT	TT/TT	TT/TT	TT/TT	CT/CT	TT/TT	TT/TT	TT/TT	CT/CT	CT/TT	TT/TT	CT/CT	CT/CT	TT/TT	TT/TT	CT/TT	CT/CT	CT/CT	TT/TT	TT/TT	TT/TT	TT/TT	TT/TT
LG5_6629139	AA/AA	GG/GG	GG/GG	AA/AA	AA/AA	AG/AG	AG/AG	AA/AA	AA/AA	GG/GG	AG/AG	AG/AG	AG/AG	GG/GG	AG/AG	AA/AA	AG/AG	AG/AG	AG/AG	GG/GG	AG/AA	AG/AG	AG/AG	AA/AA	GG/GG	AG/AG	AG/AG	AG/AG	GG/GG	AG/AG
LG8_10949668	AA/AA	AA/AA	AA/AA	AA/AA	AA/AA	AA/AA	AA/AA	AA/AA	AA/AA	AA/AA	AA/AA	AA/AA	AA/AA	AA/AA	AA/AA	AC/AC	AA/AA	AA/AA	AA/AA	AA/AA	AA/AA	AA/AA	AA/AA	AA/AA	AC/AC	AA/AA	AA/AA	AA/AA	AA/AA	AA/AA
LG5_32937502	TT/TT	TT/TT	TT/TT	TT/TT	TT/TT	GT/GT	TT/TT	TT/TT	TT/TT	GT/GT	GT/GT	TT/TT	TT/TT	GT/GT	TT/TT	TT/TT	GT/TT	GT/GT	GT/GT	GT/GT	TT/TT	GT/GT	GT/GT	TT/TT	GT/TT	TT/TT	TT/TT	TT/TT	TT/TT	TT/TT
LG5_11829807	GG/GG	GG/GG	AA/AA	AG/AG	AG/AG	GG/GG	NN/GG	AG/AG	AG/AG	GG/GG	GG/GG	AA/AG	AA/AA	GG/GG	GG/GG	NN/GG	GG/GG	GG/GG	AG/AG	AG/AG	GG/GG	GG/GG	AG/AG	GG/GG	AA/AA	NN/GG	GG/GG	NN/GG	GG/GG	GG/GG
LG14_21242228	CC/CC	CC/CC	CC/CC	CC/CC	CC/CC	CC/CC	CC/CC	CC/CC	CC/CC	CC/CC	CC/CC	CC/CC	CC/CC	CC/CC	CC/CC	CC/CC	CC/CC	CC/CC	CC/CC	CC/CC	CT/CT	CC/CC	CC/CC	CT/CT	CC/CC	CC/CC	CC/CC	CC/CC	CC/CC	CC/CC
LG18_8111675	GG/GG	GG/GG	GG/GG	GG/GG	AG/GG	GG/GG	GG/GG	AG/AG	AG/AG	AG/AG	NN/GG	GG/GG	GG/GG	GG/GG	GG/GG	AG/AG	GG/GG	GG/GG	GG/GG	AA/AA	AG/AG	GG/GG	AG/AG	GG/GG	GG/GG	GG/GG	GG/GG	GG/GG	AG/AG	GG/GG
000003012_206426	GG/GG	GG/GG	GG/GG	GG/GG	AG/AG	GG/GG	GG/GG	GG/GG	GG/GG	AG/AG	GG/GG	GG/GG	GG/GG	GG/GG	GG/GG	GG/GG	AG/AG	GG/GG	GG/GG	GG/GG	AG/GG	GG/GG	GG/GG	GG/GG	GG/GG	GG/GG	GG/GG	GG/GG	GG/GG	AG/AG
LG1_21933351	CT/CT	CT/CT	CT/CT	CT/CT	CT/CT	CT/CT	CT/CT	CT/CT	CT/CT	CT/CT	CT/CT	CT/CT	CT/CT	CT/CT	CT/CT	CT/CT	CT/CT	CT/CT	CT/CT	CT/CT	CT/CT	CT/CT	CT/CT	CT/CT	CT/CT	CT/CT	CT/CT	CT/CT	CT/CT	CT/CT
000003159_17801	AA/AA	AC/AC	AA/AA	AA/AA	AA/AA	AA/AA	AC/AC	AA/AA	AA/AA	AA/AA	AA/AA	AC/AC	AC/AA	AC/AC	AA/AA	AC/AA	AA/AA	AA/AA	AC/AC	AA/AA	AA/AA	AA/AA	AA/AA	AA/AA	AC/AC	AA/AA	AA/AA	AA/AA	AA/AA	AC/AC
LG12_7741104	CC/CC	CC/CC	CC/CC	CC/CC	CC/CC	CC/CC	CC/CC	CC/CC	CC/CC	CC/CC	CC/CC	CC/CC	CC/CC	CC/CC	CC/CC	CT/CT	CC/CC	CC/CC	CC/CC	CT/CT	CC/CC	CC/CC	CC/CC	CC/CC	CC/CC	CC/CC	CC/CC	CC/CC	CT/CT	CC/CC
LG6_17988861	TT/TT	TT/TT	TT/TT	TT/TT	CT/CT	TT/TT	TT/TT	CT/CT	CT/CT	TT/TT	TT/TT	TT/TT	TT/TT	TT/TT	TT/TT	TT/TT	CT/CT	TT/TT	TT/TT	TT/TT	TT/TT	CT/CT	TT/TT	TT/TT	TT/TT	TT/TT	TT/TT	TT/TT	TT/TT	TT/TT
LG9_3697499	CT/CT	CT/CT	TT/TT	TT/TT	CT/CT	TT/TT	TT/TT	TT/TT	TT/TT	CT/CT	TT/TT	TT/TT	TT/TT	CT/CT	TT/TT	CT/CT	TT/TT	TT/TT	TT/TT	TT/TT	TT/TT	TT/TT	CT/CT	TT/TT	CT/CT	NN/CT	TT/TT	CT/CT	CT/CT	TT/TT
LG19_611256	TT/TT	AT/AT	TT/TT	TT/TT	TT/TT	TT/TT	TT/TT	TT/TT	TT/TT	TT/TT	TT/TT	TT/TT	AT/AT	TT/TT	TT/TT	TT/TT	TT/TT	TT/TT	TT/TT	TT/TT	TT/TT	TT/TT	TT/TT	TT/TT	AT/AT	TT/TT	TT/TT	TT/TT	TT/TT	TT/TT
LG13_4333145	CC/CC	CC/CC	CC/CC	CC/CC	CT/CT	CC/CC	CC/CC	CC/CC	CC/CC	CC/CC	CC/CC	CC/CC	CC/CC	CC/CC	CC/CC	CC/CC	CC/CC	CC/CC	CC/CC	CT/CT	CC/CC	CC/CC	CC/CC	CC/CC	CT/CC	CC/CC	CC/CC	CT/CT	CC/CC	CC/CC
LG19_694992	GG/GG	GG/GG	GG/GG	GG/GG	GG/GG	GG/GG	GG/GG	GG/GG	GG/GG	GT/GT	GG/GG	GG/GG	GG/GG	GT/GT	GG/GG	GG/GG	GT/GT	GG/GG	GT/GT	GT/GT	GT/GG	GG/GG	GG/GG	GT/GG	GG/GG	GT/GT	GG/GG	GG/GG	GT/GT	GT/GG
LG18_6132868	TT/TT	TT/TT	TT/TT	TT/TT	TT/TT	TT/TT	TT/TT	TT/TT	TT/TT	TT/TT	TT/TT	TT/TT	CT/CT	TT/TT	TT/TT	CT/CT	TT/TT	TT/TT	TT/TT	TT/TT	TT/TT	TT/TT	TT/TT	TT/TT	CT/CT	CT/CT	TT/TT	TT/TT	TT/TT	CT/TT
000000192_362804	GG/GG	GG/GG	GG/GG	GG/GG	CG/CG	CG/CG	GG/GG	CG/CG	CG/GG	CG/GG	GG/GG	GG/GG	GG/GG	CG/CG	GG/GG	GG/GG	CG/GG	GG/GG	GG/GG	GG/GG	CG/GG	CG/CG	GG/GG	CG/CG	CG/CG	CG/CG	CG/CG	CG/GG	CG/CG	CG/GG
LG9_18948487	CC/CC	CC/CC	CT/CT	CT/CT	CT/CT	CC/CC	CC/CC	CT/CT	CT/CT	CC/CC	CC/CC	CT/CT	CT/CT	CC/CC	CC/CC	CT/CT	CC/CC	CT/CT	CT/CT	CT/CT	CT/CT	CC/CC	CC/CC	CC/CC	CT/CT	CT/CT	CT/CT	CC/CC	CT/CT	CC/CC
LG22_20681012	AA/AA	AA/AA	AG/AG	AA/AA	AA/AA	AA/AA	AA/AA	AA/AA	AA/AA	AA/AA	AA/AA	AA/AA	AA/AA	AA/AA	AA/AA	AA/AA	AA/AA	AA/AA	AG/AG	AG/AG	AA/AA	AA/AA	AG/AG	AA/AA	AA/AA	AA/AA	AA/AA	AA/AA	AG/AA	AA/AA
LG14_16555198	CC/CC	CC/CC	CC/CC	CC/CC	CC/CC	CC/CC	CC/CC	CT/CT	CC/CC	CC/CC	CC/CC	CC/CC	CC/CC	CC/CC	CC/CC	CC/CC	CT/CT	CC/CC	CC/CC	CC/CC	CC/CC	CT/CT	CC/CC	CC/CC	CC/CC	CC/CC	CC/CC	CC/CC	CC/CC	CC/CC
